# Supplementary material for: Hepatic transcript profiling in beef cattle: Effects of rumen-protected niacin supplementation
Source: PLoS One. 2023 Aug 3;18(8):e0289409. doi: 10.1371/journal.pone.0289409 (PMC10399858; doi:10.1371/journal.pone.0289409)
Supplement: S4 Table — (XLSX) [file pone.0289409.s009.xlsx]

## Sheet: Table S4-GO-BP
Category	Term	Count	%	PValue	Genes	List Total	Pop Hits	Pop Total	Fold Enrichment	Bonferroni	Benjamini	FDR
GOTERM_BP_DIRECT	GO:0006412~translation	29	2.58007	4.97615e-06	513222, 515228, 518758, 100848134, 286884, 614241, 504608, 615178, 614102, 533310, 618606, 505603, 505941, 788861, 509426, 505860, 282477, 504371, 515534, 286873, 404190, 505507, 768317, 787914, 282847, 532824, 282048, 326584, 282480	892	172	13824	2.61299	0.0130659	0.013152	0.013152
GOTERM_BP_DIRECT	GO:0055114~oxidation-reduction process	41	3.64769	3.1538e-05	407159, 510097, 618441, 513762, 540828, 532244, 338057, 353301, 614105, 286809, 526521, 281725, 281742, 504771, 281345, 282211, 507245, 282652, 515416, 514903, 338084, 287027, 287327, 538459, 614672, 338048, 614612, 281615, 281997, 768227, 327690, 281157, 282389, 511469, 282289, 282022, 281495, 327673, 327698, 511528, 100126042	892	316	13824	2.01079	0.0799766	0.0416774	0.0416774
GOTERM_BP_DIRECT	GO:0045454~cell redox homeostasis	12	1.06762	0.00104244	281997, 100125923, 282389, 513762, 614672, 281373, 777788, 522986, 513509, 515416, 511528, 788063	892	58	13824	3.20643	0.936494	0.918393	0.918393
GOTERM_BP_DIRECT	GO:0006915~apoptotic process	20	1.77936	0.0677018	508291, 514033, 535344, 514688, 100125238, 615013, 532550, 512480, 618405, 493720, 506610, 100137737, 534216, 282420, 327682, 280991, 777788, 510427, 282480, 512824	892	204	13824	1.51939	1	1	1
GOTERM_BP_DIRECT	GO:0015031~protein transport	18	1.60142	0.0820822	512213, 513138, 540685, 522269, 767859, 504449, 613720, 505941, 508703, 768007, 282601, 508510, 510499, 282531, 512427, 507199, 505082, 538819	892	183	13824	1.52437	1	1	1
GOTERM_BP_DIRECT	GO:0006468~protein phosphorylation	17	1.51246	0.0150723	534280, 515723, 509080, 100125238, 521237, 504526, 532713, 281357, 282324, 506235, 282420, 508487, 538659, 282322, 280991, 282089, 513539	892	137	13824	1.92308	1	1	1
GOTERM_BP_DIRECT	GO:0043065~positive regulation of apoptotic process	15	1.33452	0.0475319	615340, 616730, 525506, 767866, 514460, 618405, 787914, 504506, 768039, 100295316, 280820, 280730, 534216, 327682, 768073	892	133	13824	1.74787	1	1	1
GOTERM_BP_DIRECT	GO:0030335~positive regulation of cell migration	14	1.24555	0.0656025	510140, 522269, 525506, 517111, 281915, 767866, 281408, 509418, 100298939, 506246, 327682, 282089, 509221, 508076	892	127	13824	1.70841	1	1	1
GOTERM_BP_DIRECT	GO:0051260~protein homooligomerization	14	1.24555	0.0759178	538467, 511774, 101903772, 512480, 280958, 618606, 532327, 280730, 525378, 506235, 327685, 512402, 507393, 327699	892	130	13824	1.66899	1	1	1
GOTERM_BP_DIRECT	GO:0018105~peptidyl-serine phosphorylation	13	1.15658	0.0567524	506060, 781037, 509080, 513675, 524218, 504526, 532713, 504986, 522002, 788091, 282322, 280991, 534923	892	112	13824	1.79885	1	1	1
GOTERM_BP_DIRECT	GO:0043161~proteasome-mediated ubiquitin-dependent protein catabolic process	13	1.15658	0.077758	512499, 512456, 515112, 616156, 517357, 617935, 505757, 507417, 533435, 513646, 281495, 777788, 511803	892	118	13824	1.70738	1	1	1
GOTERM_BP_DIRECT	GO:0000398~mRNA splicing, via spliceosome	12	1.06762	0.0236647	522372, 613705, 614551, 767817, 615136, 780845, 509802, 531382, 531493, 523250, 504381, 613304	892	87	13824	2.13762	1	1	1
GOTERM_BP_DIRECT	GO:0006457~protein folding	12	1.06762	0.0835121	783009, 514033, 512356, 281047, 520883, 616553, 614795, 281373, 511467, 522986, 513509, 788063	892	107	13824	1.73807	1	1	1
GOTERM_BP_DIRECT	GO:0006397~mRNA processing	11	0.978648	0.0562597	616095, 540258, 539700, 534721, 789082, 529231, 531673, 282322, 516462, 512824, 504506	892	88	13824	1.93722	1	1	1
GOTERM_BP_DIRECT	GO:0006979~response to oxidative stress	10	0.88968	0.0155797	533726, 286809, 281997, 503578, 281742, 287027, 618441, 100125238, 282022, 616621	892	61	13824	2.54062	1	1	1
GOTERM_BP_DIRECT	GO:0051726~regulation of cell cycle	10	0.88968	0.0297681	518935, 280831, 513131, 515056, 534306, 280730, 327682, 516462, 511676, 618405	892	68	13824	2.27908	1	1	1
GOTERM_BP_DIRECT	GO:0070125~mitochondrial translational elongation	10	0.88968	0.0670353	515228, 281556, 506358, 540278, 614102, 511479, 505681, 510347, 533011, 538054	892	79	13824	1.96174	1	1	1
GOTERM_BP_DIRECT	GO:0051897~positive regulation of protein kinase B signaling	9	0.800712	0.0346007	280787, 617960, 511774, 516598, 282089, 280939, 504526, 281240, 404185	892	59	13824	2.36406	1	1	1
GOTERM_BP_DIRECT	GO:0071222~cellular response to lipopolysaccharide	9	0.800712	0.0801431	522905, 768225, 532933, 534280, 535344, 516598, 541268, 513844, 525408	892	70	13824	1.99257	1	1	1
GOTERM_BP_DIRECT	GO:0035264~multicellular organism growth	9	0.800712	0.0910545	515654, 768039, 539542, 534280, 533229, 515723, 100125238, 507620, 540153	892	72	13824	1.93722	1	1	1
GOTERM_BP_DIRECT	GO:0097190~apoptotic signaling pathway	8	0.711744	0.00726543	338084, 506610, 280730, 504653, 525506, 327685, 510427, 528782	892	36	13824	3.44395	1	1	1
GOTERM_BP_DIRECT	GO:0008625~extrinsic apoptotic signaling pathway via death domain receptors	7	0.622776	0.00780569	282527, 280730, 541268, 534721, 615013, 513834, 534251	892	28	13824	3.87444	1	1	1
GOTERM_BP_DIRECT	GO:0001889~liver development	7	0.622776	0.0229566	280831, 504986, 503578, 100294979, 338067, 767866, 519165	892	35	13824	3.09955	1	1	1
GOTERM_BP_DIRECT	GO:0032543~mitochondrial translation	7	0.622776	0.0560393	508825, 515228, 338063, 614102, 505681, 533011, 538054	892	43	13824	2.52289	1	1	1
GOTERM_BP_DIRECT	GO:0006914~autophagy	7	0.622776	0.0797578	528410, 506995, 540685, 282883, 282531, 539480, 282691	892	47	13824	2.30818	1	1	1
GOTERM_BP_DIRECT	GO:0006364~rRNA processing	7	0.622776	0.0797578	515056, 534721, 518046, 505507, 618429, 512925, 787914	892	47	13824	2.30818	1	1	1
GOTERM_BP_DIRECT	GO:0016525~negative regulation of angiogenesis	7	0.622776	0.0864449	768039, 280820, 539542, 541268, 508632, 509963, 280939	892	48	13824	2.26009	1	1	1
GOTERM_BP_DIRECT	GO:0030178~negative regulation of Wnt signaling pathway	6	0.533808	0.0271371	509040, 514852, 789390, 327682, 788119, 407210	892	27	13824	3.44395	1	1	1
GOTERM_BP_DIRECT	GO:0010718~positive regulation of epithelial to mesenchymal transition	6	0.533808	0.0313395	530147, 282089, 509221, 515834, 767866, 539340	892	28	13824	3.32095	1	1	1
GOTERM_BP_DIRECT	GO:0007266~Rho protein signal transduction	6	0.533808	0.0313395	614857, 511099, 514852, 338054, 618745, 515749	892	28	13824	3.32095	1	1	1
GOTERM_BP_DIRECT	GO:0008630~intrinsic apoptotic signaling pathway in response to DNA damage	6	0.533808	0.0791691	282527, 280730, 574093, 615013, 533652, 788119	892	36	13824	2.58296	1	1	1
GOTERM_BP_DIRECT	GO:0043277~apoptotic cell clearance	5	0.44484	0.0026296	534280, 505632, 516598, 282691, 504526	892	10	13824	7.74888	0.99905	1	1
GOTERM_BP_DIRECT	GO:0042730~fibrinolysis	5	0.44484	0.0101893	280789, 280820, 281035, 281408, 614844	892	14	13824	5.53491	1	1	1
GOTERM_BP_DIRECT	GO:0034198~cellular response to amino acid starvation	5	0.44484	0.030545	507528, 526642, 506754, 521542, 508487	892	19	13824	4.07836	1	1	1
GOTERM_BP_DIRECT	GO:0043542~endothelial cell migration	5	0.44484	0.030545	519617, 100137722, 538697, 281122, 781625	892	19	13824	4.07836	1	1	1
GOTERM_BP_DIRECT	GO:0060976~coronary vasculature development	5	0.44484	0.036291	529972, 510559, 615688, 282183, 781625	892	20	13824	3.87444	1	1	1
GOTERM_BP_DIRECT	GO:0030866~cortical actin cytoskeleton organization	5	0.44484	0.0570042	539545, 514541, 100294979, 510203, 783470	892	23	13824	3.36908	1	1	1
GOTERM_BP_DIRECT	GO:0001890~placenta development	5	0.44484	0.0570042	504558, 533229, 503578, 511779, 787914	892	23	13824	3.36908	1	1	1
GOTERM_BP_DIRECT	GO:0009306~protein secretion	5	0.44484	0.0570042	514541, 520286, 504235, 505124, 100125881	892	23	13824	3.36908	1	1	1
GOTERM_BP_DIRECT	GO:0006695~cholesterol biosynthetic process	5	0.44484	0.0650555	407159, 533726, 537301, 281179, 281004	892	24	13824	3.2287	1	1	1
GOTERM_BP_DIRECT	GO:0042254~ribosome biogenesis	5	0.44484	0.0736657	505603, 509768, 510820, 506152, 505082	892	25	13824	3.09955	1	1	1
GOTERM_BP_DIRECT	GO:0043491~protein kinase B signaling	5	0.44484	0.082821	516598, 280991, 282089, 504526, 506083	892	26	13824	2.98034	1	1	1
GOTERM_BP_DIRECT	GO:0006310~DNA recombination	5	0.44484	0.082821	531945, 506610, 615133, 100124507, 282691	892	26	13824	2.98034	1	1	1
GOTERM_BP_DIRECT	GO:0016197~endosomal transport	5	0.44484	0.0925051	514541, 618168, 512522, 505361, 533055	892	27	13824	2.86996	1	1	1
GOTERM_BP_DIRECT	GO:0032008~positive regulation of TOR signaling	5	0.44484	0.0925051	507528, 526642, 506754, 511903, 504526	892	27	13824	2.86996	1	1	1
GOTERM_BP_DIRECT	GO:0031065~positive regulation of histone deacetylation	4	0.355872	0.0167132	522905, 513131, 539700, 282089	892	9	13824	6.88789	1	1	1
GOTERM_BP_DIRECT	GO:0007369~gastrulation	4	0.355872	0.0167132	522372, 538602, 327682, 787914	892	9	13824	6.88789	1	1	1
GOTERM_BP_DIRECT	GO:0043254~regulation of protein complex assembly	4	0.355872	0.0227491	531802, 512908, 280820, 541268	892	10	13824	6.1991	1	1	1
GOTERM_BP_DIRECT	GO:0019430~removal of superoxide radicals	4	0.355872	0.0227491	281997, 537301, 281495, 532481	892	10	13824	6.1991	1	1	1
GOTERM_BP_DIRECT	GO:0035924~cellular response to vascular endothelial growth factor stimulus	4	0.355872	0.0298089	541268, 788091, 280991, 767866	892	11	13824	5.63555	1	1	1
GOTERM_BP_DIRECT	GO:0030206~chondroitin sulfate biosynthetic process	4	0.355872	0.0298089	613734, 523460, 540002, 493989	892	11	13824	5.63555	1	1	1
GOTERM_BP_DIRECT	GO:2000249~regulation of actin cytoskeleton reorganization	4	0.355872	0.0378829	509418, 514407, 525506, 282089	892	12	13824	5.16592	1	1	1
GOTERM_BP_DIRECT	GO:0097193~intrinsic apoptotic signaling pathway	4	0.355872	0.056974	100298939, 280730, 618210, 511414	892	14	13824	4.42793	1	1	1
GOTERM_BP_DIRECT	GO:0043536~positive regulation of blood vessel endothelial cell migration	4	0.355872	0.056974	509963, 280991, 516099, 282089	892	14	13824	4.42793	1	1	1
GOTERM_BP_DIRECT	GO:0046907~intracellular transport	4	0.355872	0.067918	528191, 508641, 512628, 506836	892	15	13824	4.13274	1	1	1
GOTERM_BP_DIRECT	GO:0007492~endoderm development	4	0.355872	0.067918	539542, 538602, 282089, 767866	892	15	13824	4.13274	1	1	1
GOTERM_BP_DIRECT	GO:0048147~negative regulation of fibroblast proliferation	4	0.355872	0.0797338	280730, 533865, 541268, 510991	892	16	13824	3.87444	1	1	1
GOTERM_BP_DIRECT	GO:0035904~aorta development	4	0.355872	0.0797338	529972, 510559, 282183, 781625	892	16	13824	3.87444	1	1	1
GOTERM_BP_DIRECT	GO:0030150~protein import into mitochondrial matrix	4	0.355872	0.0797338	614074, 509797, 444880, 505393	892	16	13824	3.87444	1	1	1
GOTERM_BP_DIRECT	GO:0042832~defense response to protozoan	4	0.355872	0.0923691	617628, 100298939, 510943, 282470	892	17	13824	3.64653	1	1	1
GOTERM_BP_DIRECT	GO:0033159~negative regulation of protein import into nucleus, translocation	3	0.266904	0.0119157	281971, 510991, 504526	892	3	13824	15.4978	1	1	1
GOTERM_BP_DIRECT	GO:0060528~secretory columnal luminar epithelial cell differentiation involved in prostate glandular acinus development	3	0.266904	0.0228152	507554, 512993, 767866	892	4	13824	11.6233	1	1	1
GOTERM_BP_DIRECT	GO:0019243~methylglyoxal catabolic process to D-lactate via S-lactoyl-glutathione	3	0.266904	0.0364131	616561, 513454, 511836	892	5	13824	9.29865	1	1	1
GOTERM_BP_DIRECT	GO:2000643~positive regulation of early endosome to late endosome transport	3	0.266904	0.0523169	528487, 517111, 509221	892	6	13824	7.74888	1	1	1
GOTERM_BP_DIRECT	GO:0032287~peripheral nervous system myelin maintenance	3	0.266904	0.0701737	280991, 281495, 534923	892	7	13824	6.6419	1	1	1
GOTERM_BP_DIRECT	GO:0010873~positive regulation of cholesterol esterification	3	0.266904	0.0701737	527114, 537301, 281004	892	7	13824	6.6419	1	1	1
GOTERM_BP_DIRECT	GO:0043117~positive regulation of vascular permeability	3	0.266904	0.0701737	100137722, 281971, 282089	892	7	13824	6.6419	1	1	1
GOTERM_BP_DIRECT	GO:0002281~macrophage activation involved in immune response	3	0.266904	0.0896662	282390, 282691, 510427	892	8	13824	5.81166	1	1	1
GOTERM_BP_DIRECT	GO:0045647~negative regulation of erythrocyte differentiation	3	0.266904	0.0896662	768039, 518935, 532376	892	8	13824	5.81166	1	1	1
